# Supplementary material for: Ultra-durable and flexible fibrous mild quasi-solid-state Ag–Zn batteries with Na2SO4electrolyte additive
Source: Royal Society of Chemistry journal article supplement (doi:10.1039/d2ta07365j), 2022-01-01
Supplement: d2ta07365j1.pdf [file d2ta07365j1.pdf]

## **Ultra-Durable and Flexible Fibrous Mild Quasi-Solid-State Ag-Zn Battery with Na<sub>2</sub>SO<sub>4</sub> Electrolyte Additive**

Chaowei Li,<sup>a,b, 1,\*</sup> Wenhui Wang,<sup>b,1</sup> Xiaojuan Sun,<sup>a</sup> Haili Hou,<sup>a</sup> Chen Zheng,<sup>a</sup> Jinagchao Zhang,<sup>a</sup>  
Fengjun Hou,<sup>a</sup> Daojun Zhang,<sup>a</sup> Jimin Du,<sup>a</sup> Yagang Yao<sup>b,c,\*</sup>

<sup>a</sup> Henan Key Laboratory of New Optoelectronic Functional Materials, College of Chemistry and  
Chemical Engineering, Anyang Normal University, 436 Xian'ge Road, Anyang 455000, China

<sup>b</sup> National Laboratory of Solid State Microstructures, College of Engineering and Applied Sciences,  
and Collaborative Innovation Center of Advanced Microstructures, Nanjing University, Nanjing  
210093, China

<sup>c</sup> Division of Nanomaterials and Jiangxi Key Lab of Carbonene Materials, Suzhou Institute of Nano-  
Tech and Nano-Bionics, Nanchang, Chinese Academy of Sciences, Nanchang 330200, China

<sup>1</sup> These authors contributed equally to this work

\*Corresponding Authors, E-mail: cwli2014@sinano.ac.cn; ygyao2018@nju.edu.cn

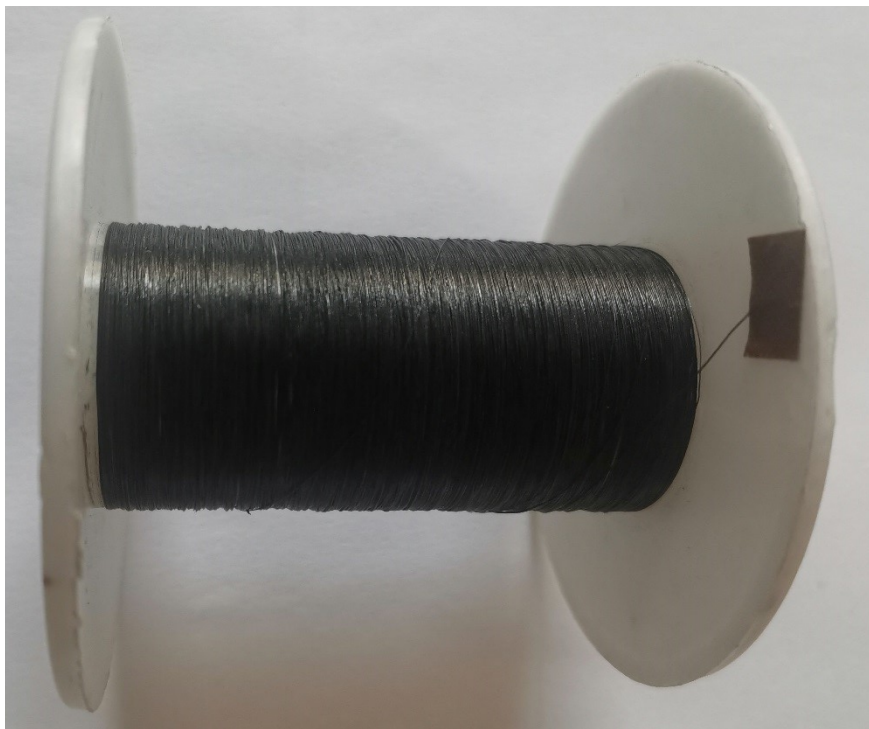

**Fig. S1** The photograph of long CNTF current collector.

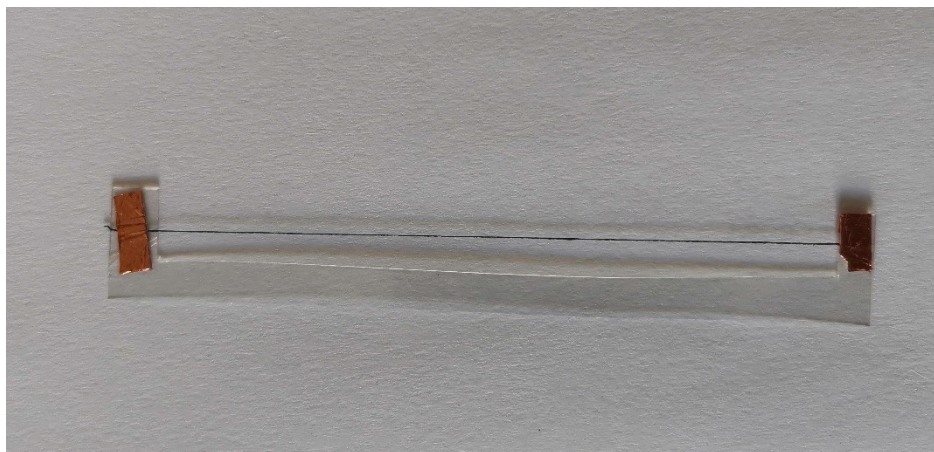

**Fig. S2** The photograph of CNTF-NCA-Ag cathode.

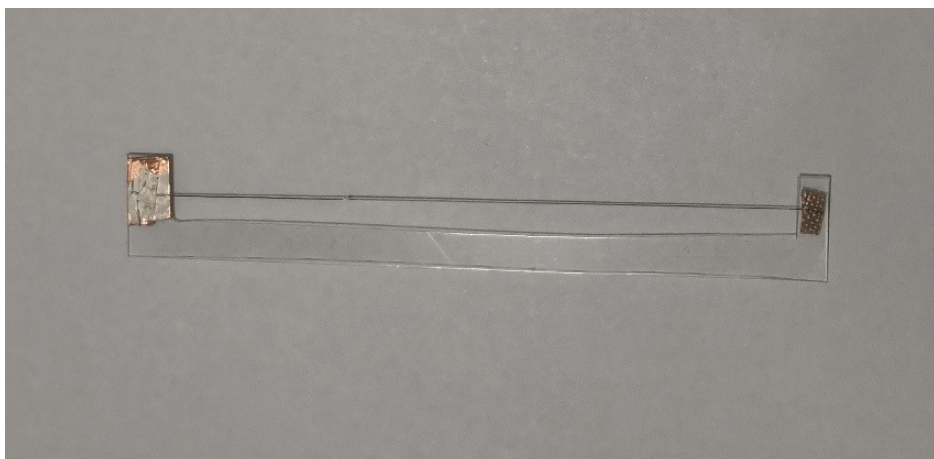

**Fig. S3** The photograph of CNTF-Zn anode.

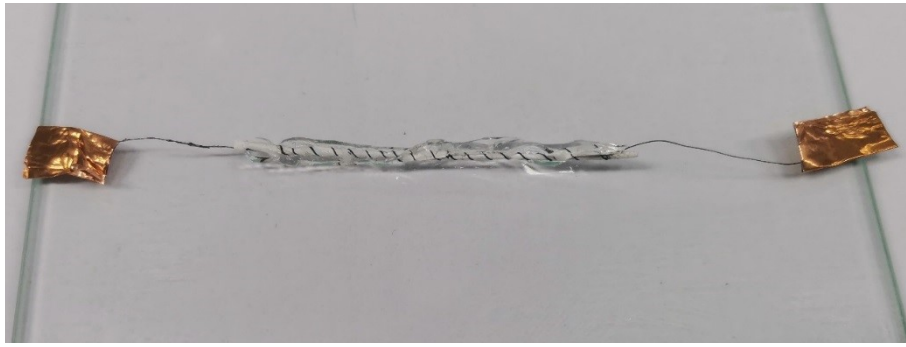

**Fig. S4** The photograph of fiber shaped Ag-Zn battery without packaging material.

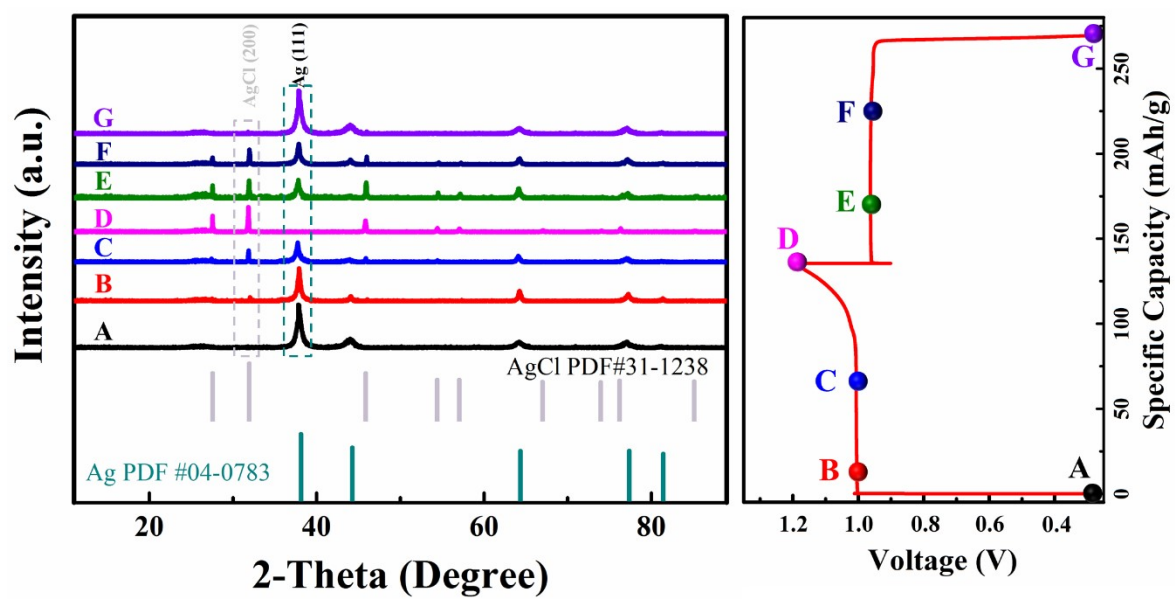

**Fig. S5** The ex-situ XRD patterns of Ag cathode in 2 M  $\text{ZnCl}_2$  + 0.5 M  $\text{Na}_2\text{SO}_4$  electrolyte at the current density of 0.1 A/g.

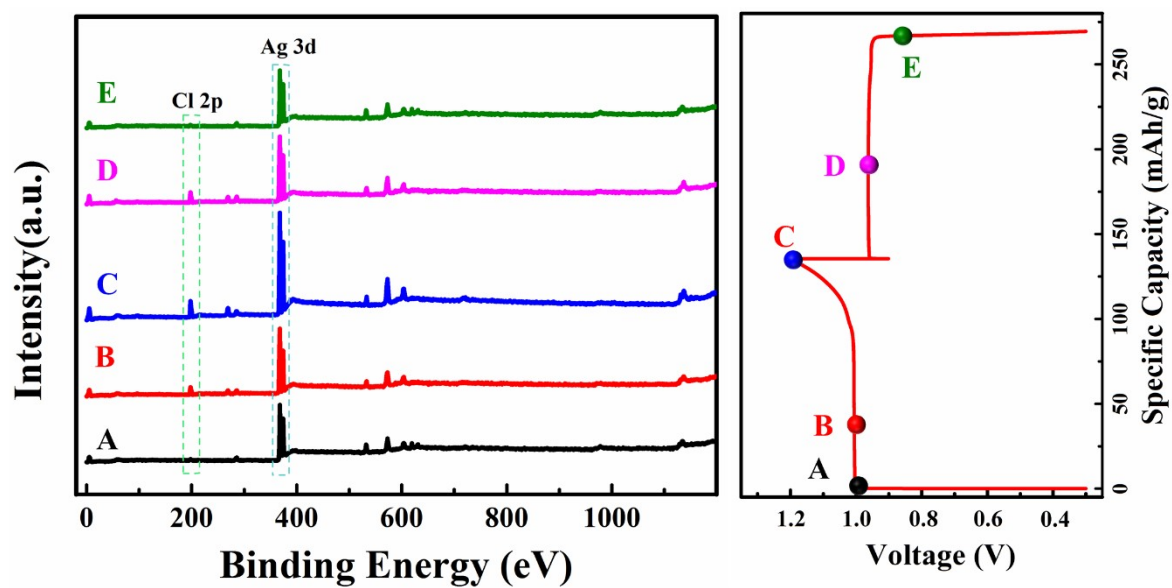

**Fig. S6** The ex-situ XPS spectroscopy of Ag cathode in 2 M  $\text{ZnCl}_2$  + 0.5 M  $\text{Na}_2\text{SO}_4$  electrolyte at the current density of 0.1 A/g.

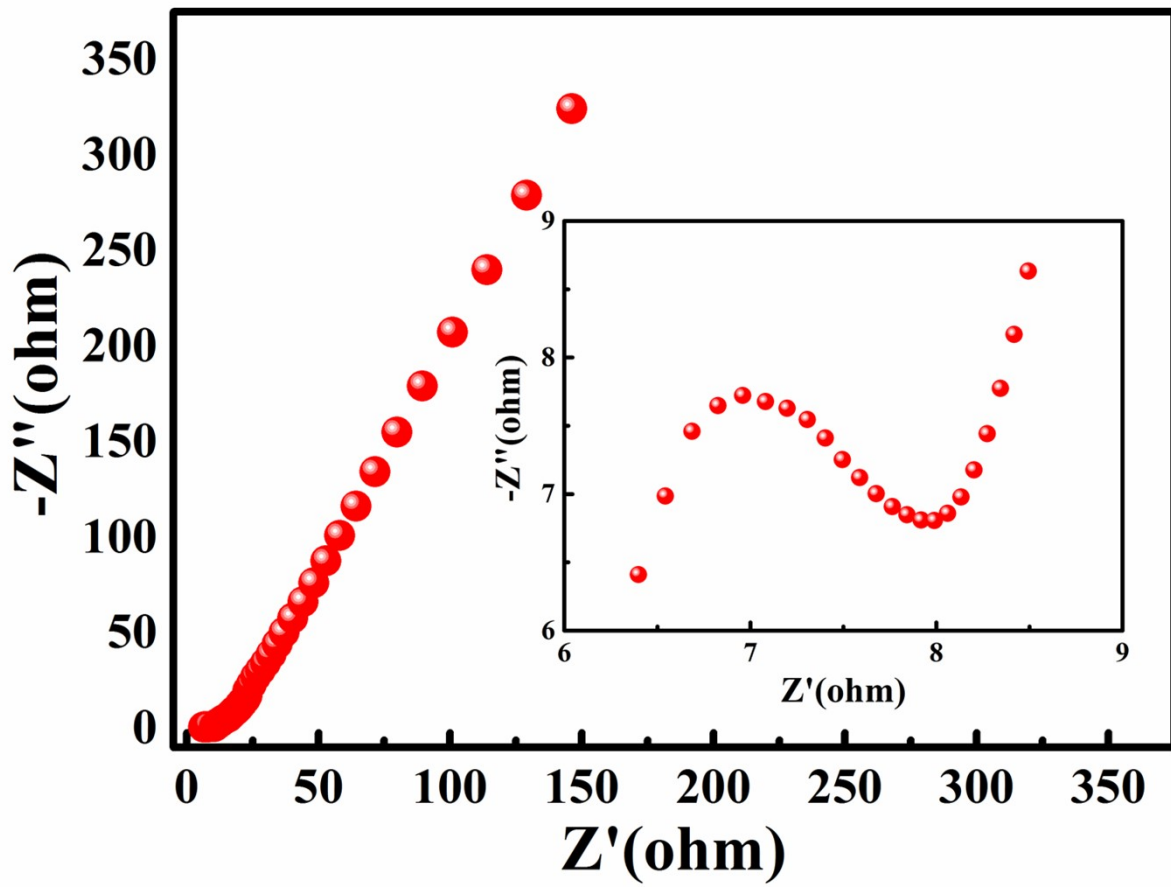

Fig.

Fig. S7 Nyquist plot of the aqueous mild Ag-Zn batteries at frequencies from  $10^{-2}$  to  $10^5$  Hz at open-circuit potential (Inset: enlarged plot in high-frequency range)



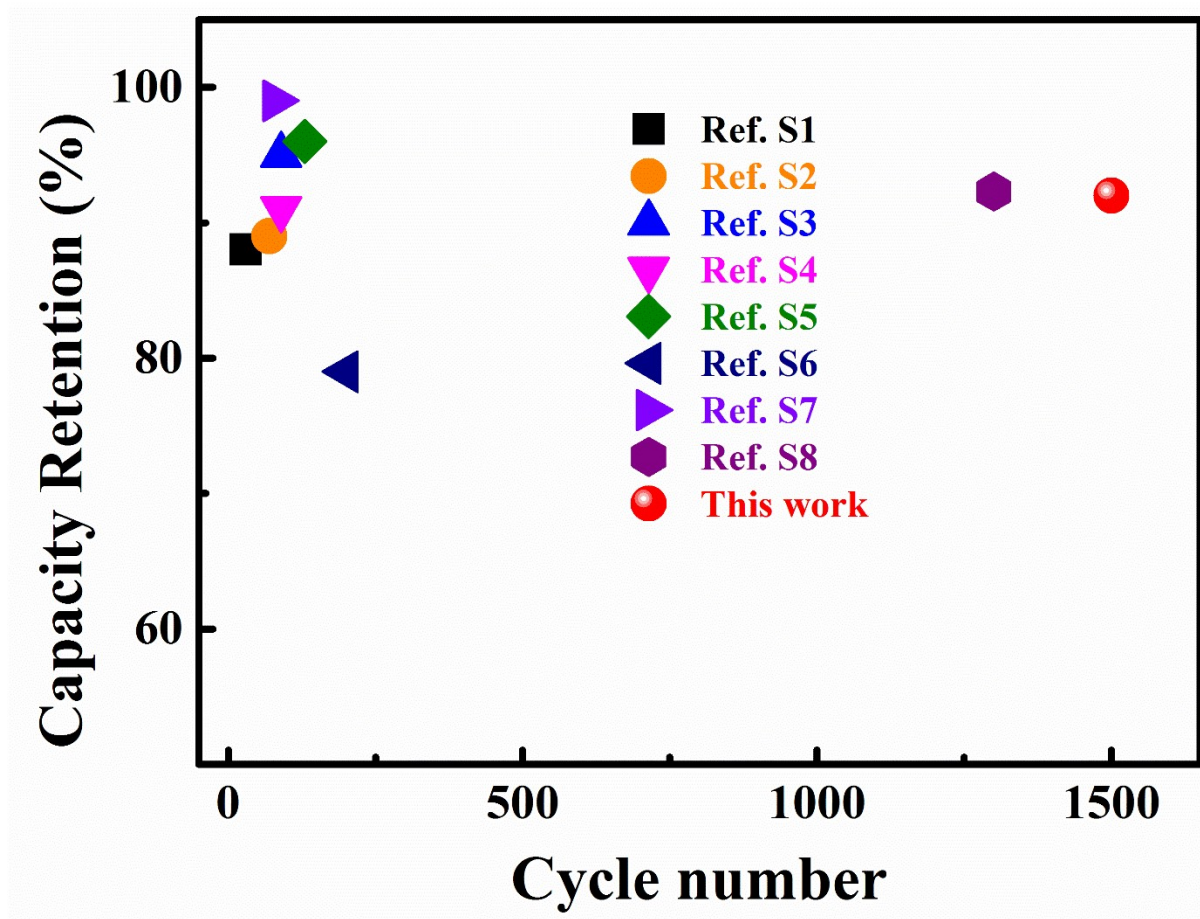

Fig. S8 Cyclic performance of Ag-Zn batteries in recently reported literatures.<sup>1-8</sup>

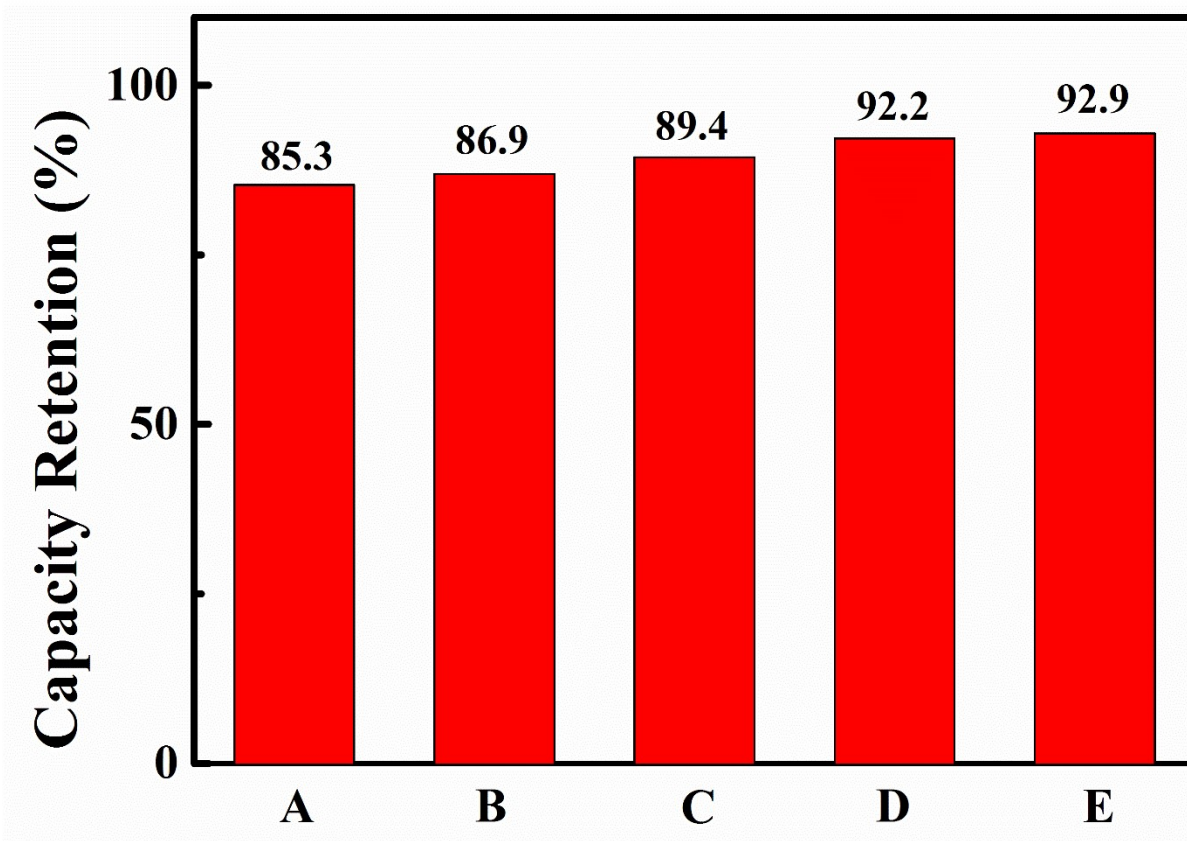

**Fig. S9** The Cyclic performance of mild Ag-Zn batteries in different electrolytes: A, 2 M ZnCl<sub>2</sub>; B, 2 M ZnCl<sub>2</sub> + 0.1 M Na<sub>2</sub>SO<sub>4</sub>; C, 2 M ZnCl<sub>2</sub> + 0.3 M Na<sub>2</sub>SO<sub>4</sub>; D, 2 M ZnCl<sub>2</sub> + 0.5 M Na<sub>2</sub>SO<sub>4</sub>; E, 2 M ZnCl<sub>2</sub> + 0.9 M Na<sub>2</sub>SO<sub>4</sub>.

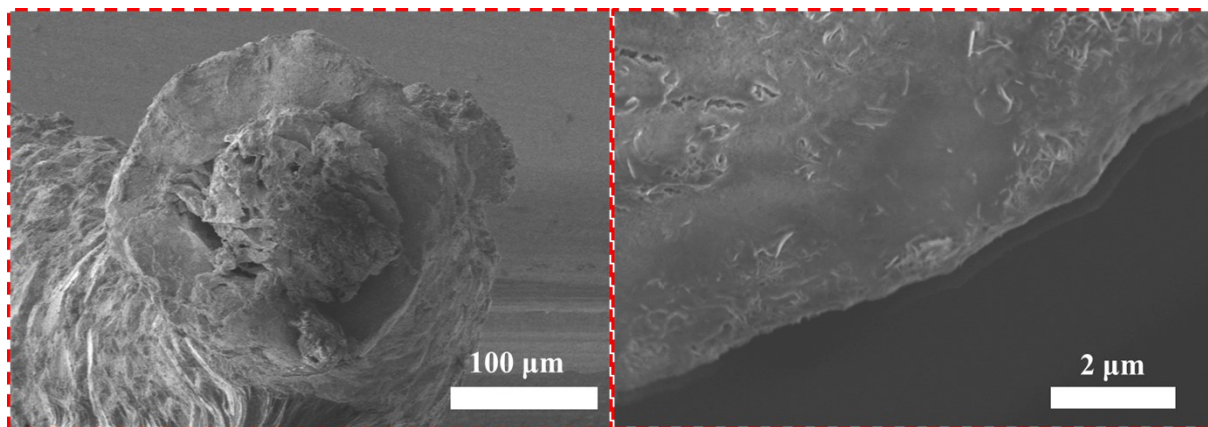

**Fig. S10** The cross-sectional microscopic images of CNTF-Zn anode in 2 M  $\text{ZnCl}_2$  + 0.5 M  $\text{Na}_2\text{SO}_4$  after cyclic measurement.

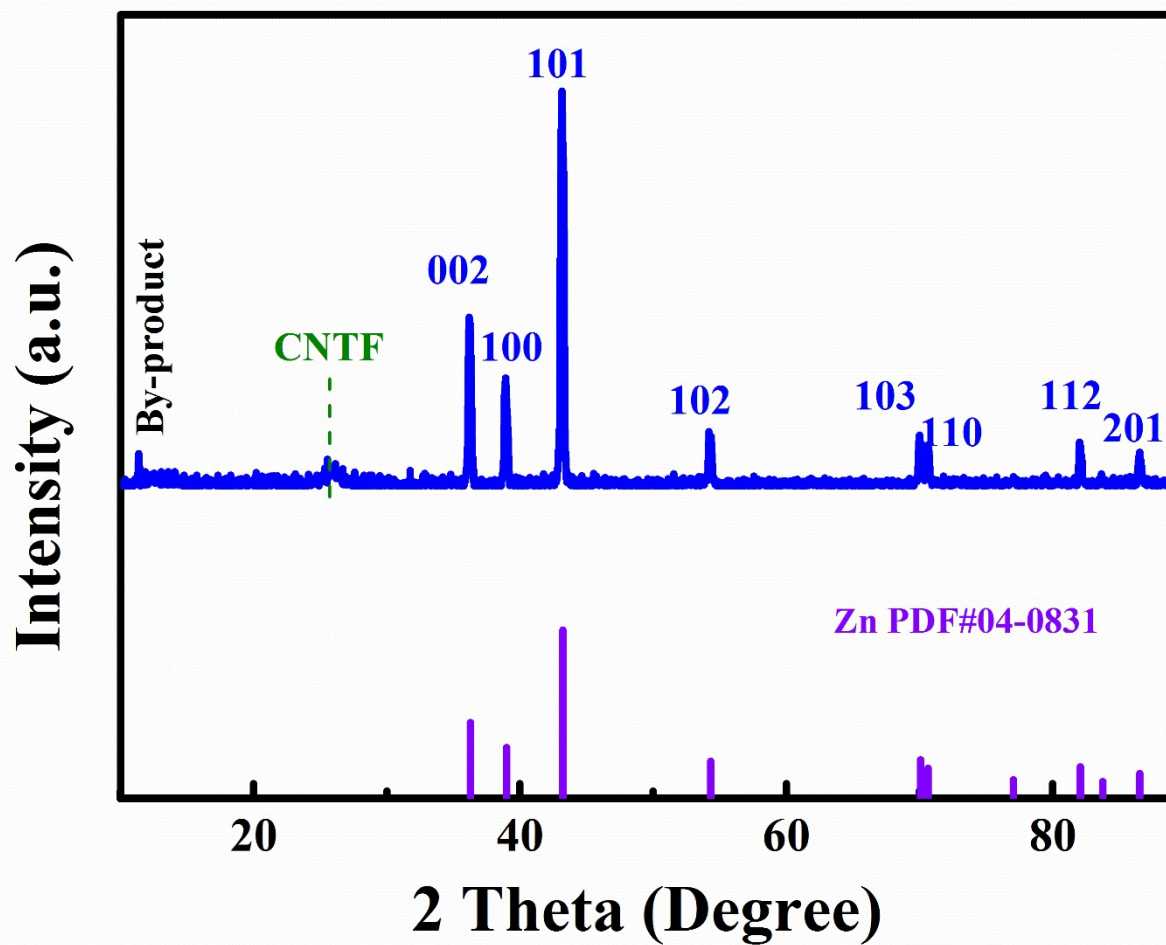

**Fig. S11** The XRD of Zn anode after cyclic test, where the by-product of  $Zn_5(OH)_8Cl_2 \cdot H_2O$  (PDF#07-0155) certainly exist.

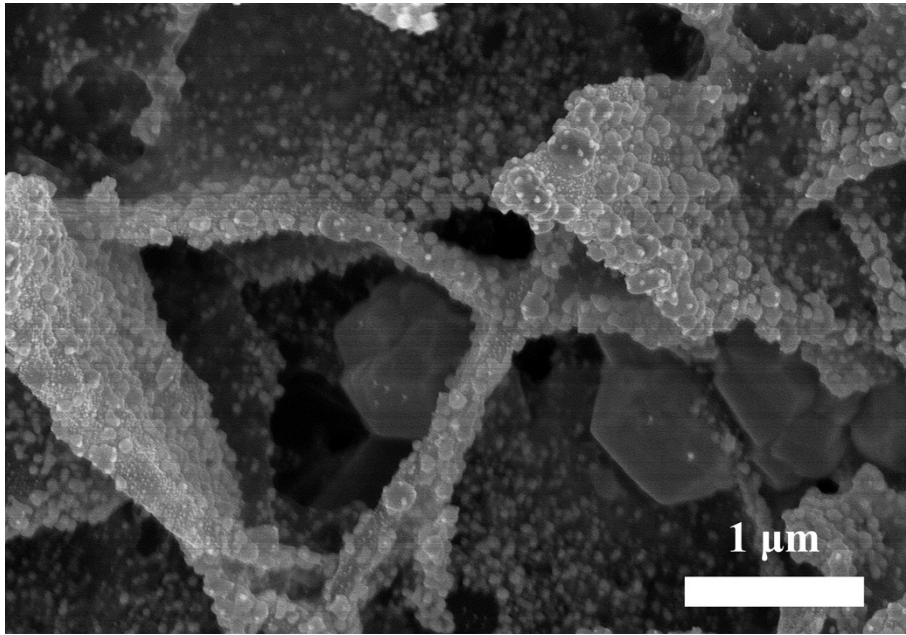

**Fig. S12** The SEM image of CNTF-NCA-Ag cathode after cyclic measurement.



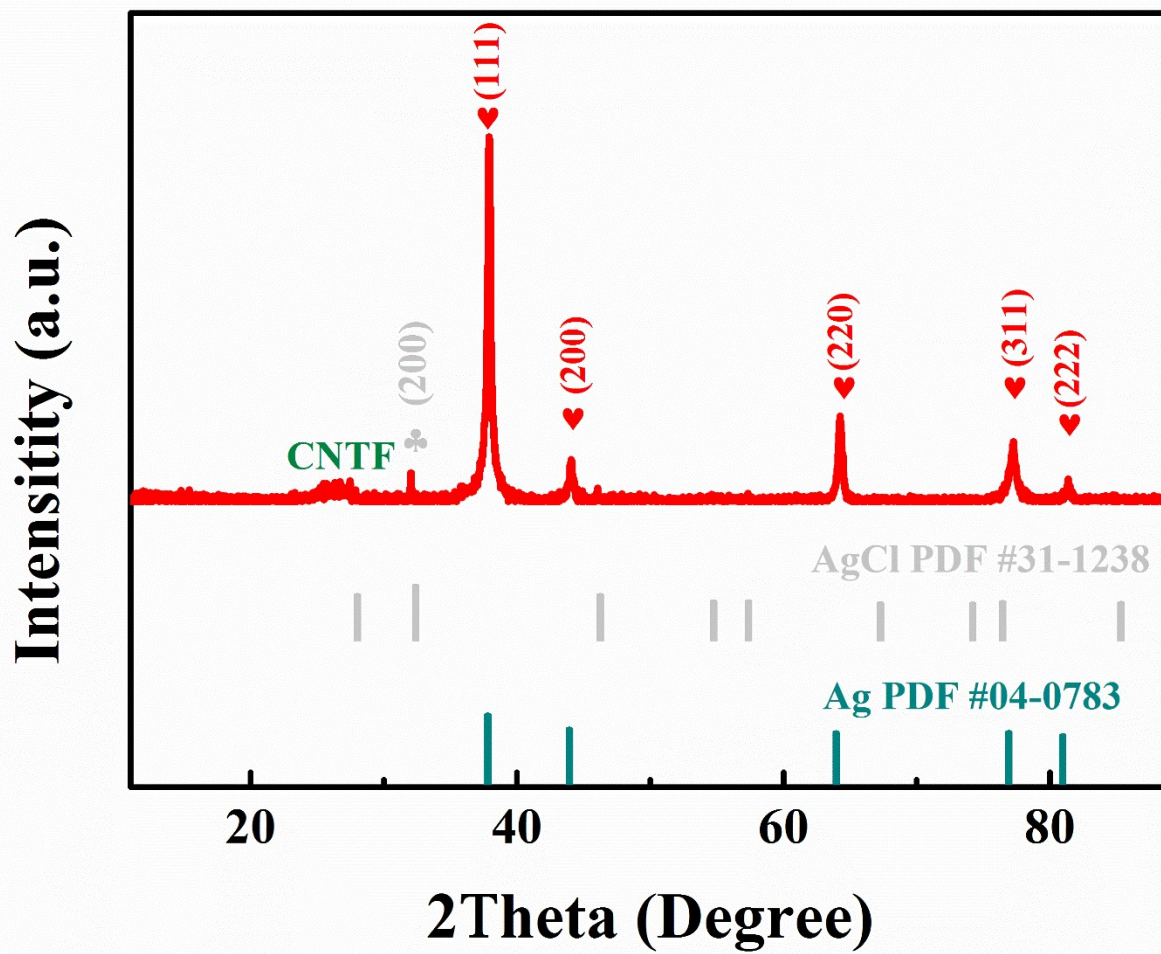

Fig. S13 The XRD of cathode after cyclic test.

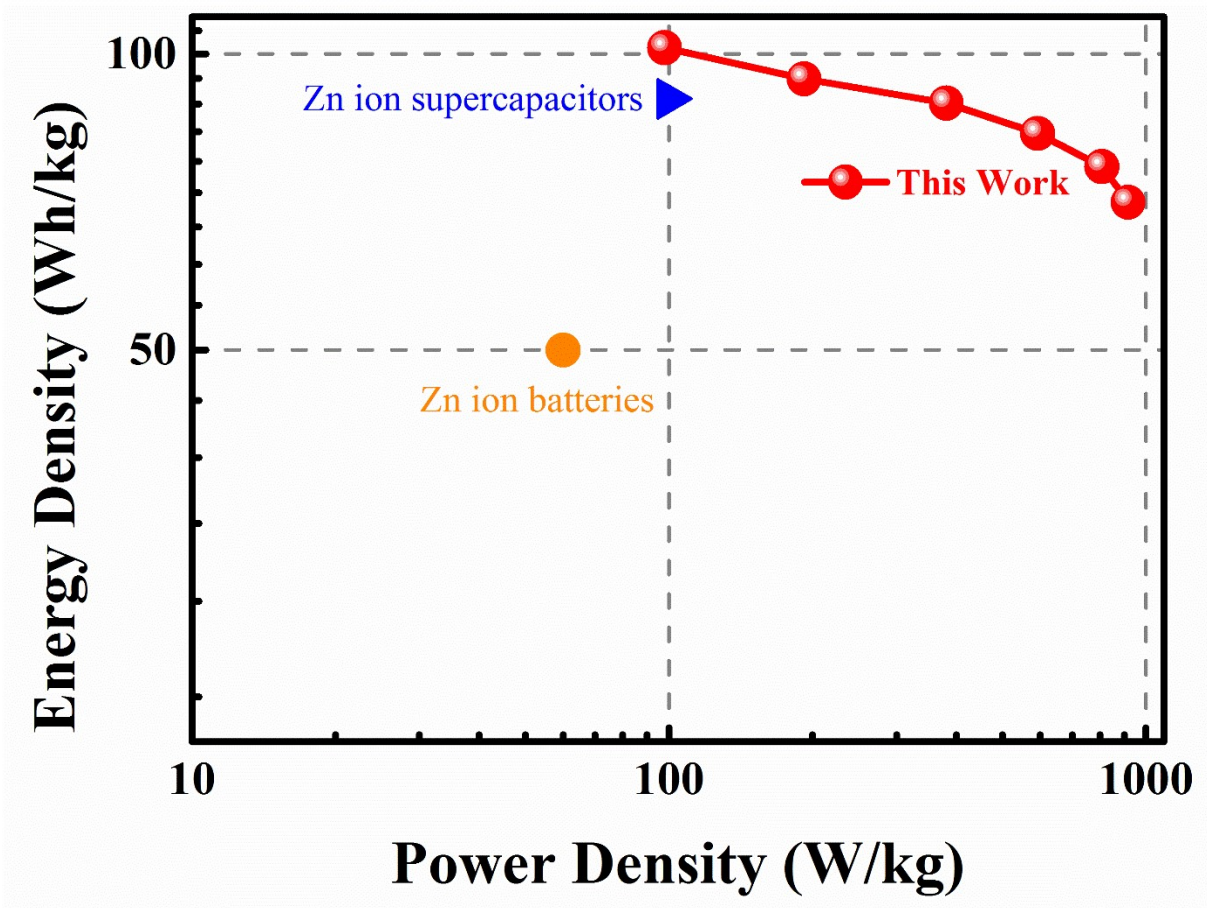

**Fig. S14** The Ragone plot of energy densities versus power densities of the flexible quasi-solid-state mild Ag-Zn and previously published aqueous batteries<sup>9</sup> and supercapacitors<sup>10</sup>.

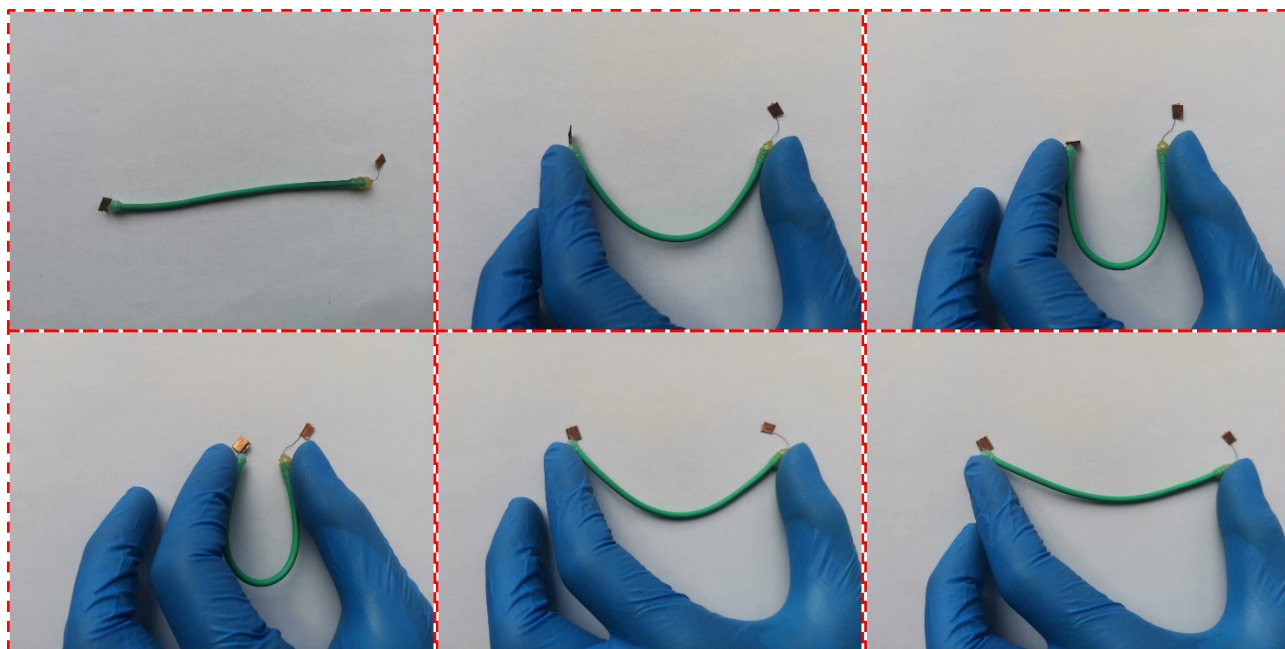

**Fig. S15** the photographs of as-made quasi-solid-state device at different bending angle



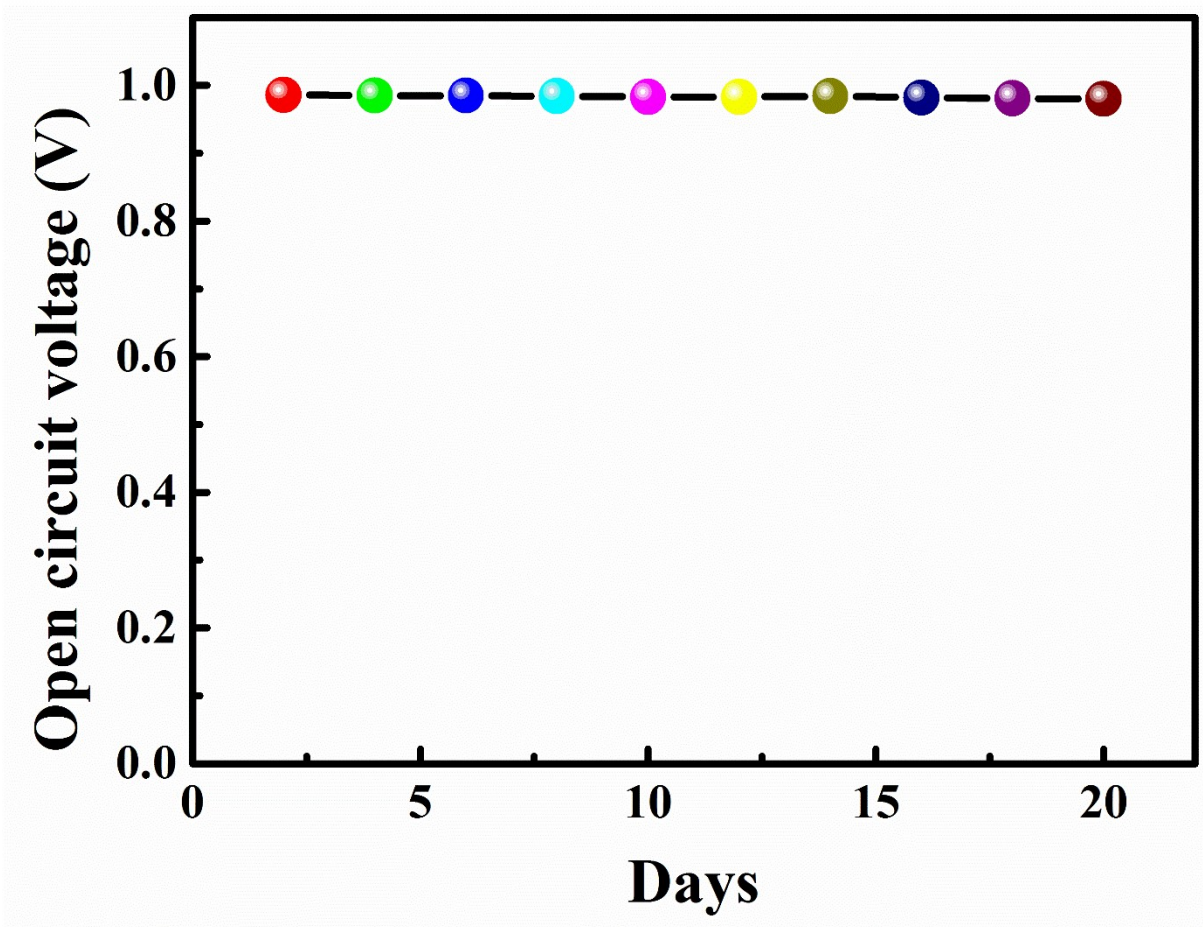

**Fig. S16** The self-discharge performance of the flexible quasi-solid-state mild Ag-Zn battery.

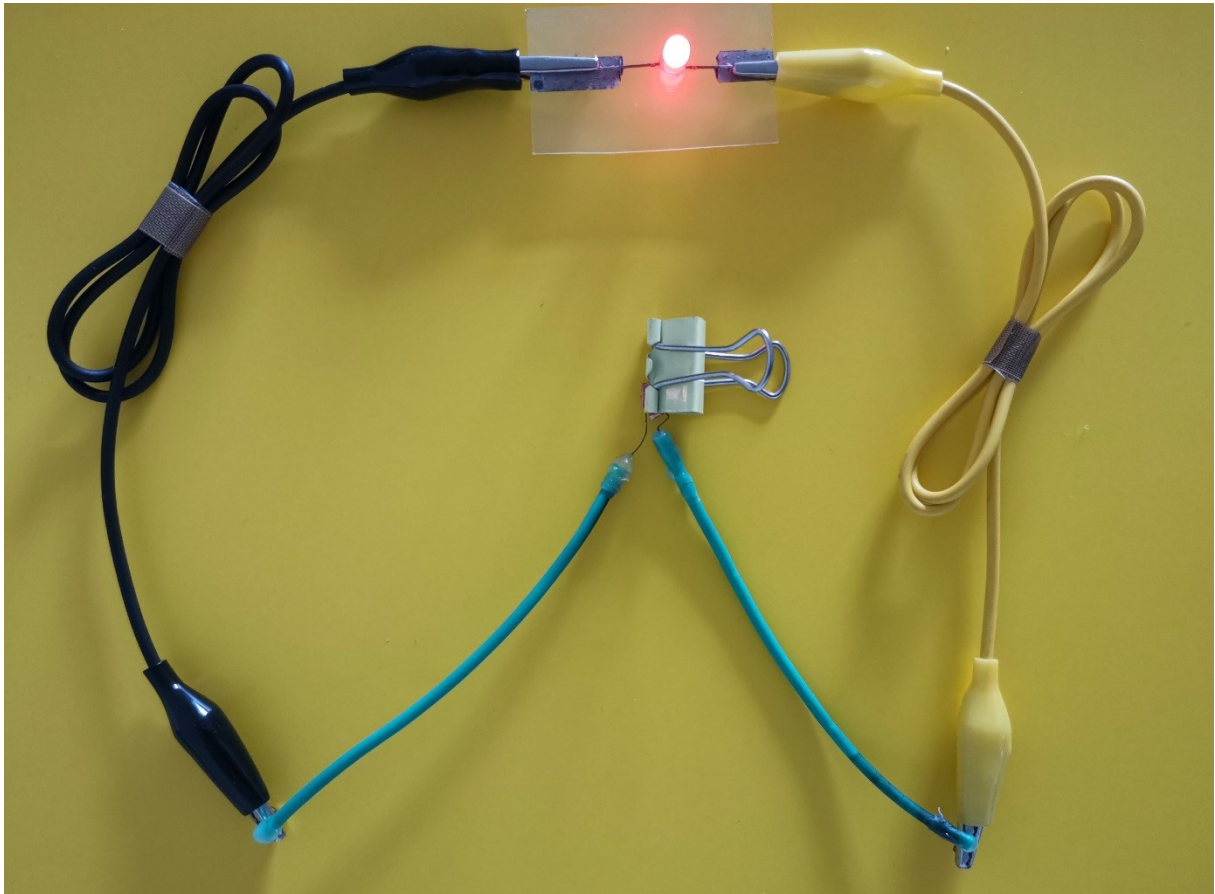

**Fig. S17** A red LED bulb lighted by two devices connected in series.

## References

- S1. R. Kumar, J. Shin, L. Yin, J. M. You, Y. S. Meng and J. Wang, *Adv. Energy Mater.*, 2017, **7**, 1602096.
- S2. C. Li, Q. Zhang, J. Sun, T. Li, S. E, Z. Zhu, B. He, Z. Zhou, Q. Li and Y. Yao, *ACS Energy Lett.*, 2018, **3**, 2761-2768.
- S3. L. Lyu, Y. Gao, Y. Wang, L. Xiao, J. Lu and L. Zhuang, *Chem. Phys. Lett.*, 2019, **723**, 102-110.
- S4. A. M. Zamarayeva, A. E. Ostfeld, M. Wang, J. K. Duey, I. Deckman, B. P. Lechêne, G. Davies, D. A. Steingart and A. C. Arias, *Sci. Adv.*, 2017, **3**, e1602051.
- S5. A. M. Zamarayeva, A. M. Gaikwad, I. Deckman, M. Wang, B. Khau, D. A. Steingart and A. C. Arias, *Adv. Electron. Mater.*, 2016, **2**, 1500296.
- S6. C. Li, Q. Zhang, E. Songfeng, T. Li, Z. Zhu, B. He, Z. Zhou, P. Man, Q. Li and Y. Yao, *J. Mater. Chem. A*, 2019, **7**, 2034-2040.
- S7. L. Yin, J. Scharf, J. Ma, J.-M. Doux, C. Redquest, V. L. Le, Y. Yin, J. Ortega, X. Wei and J. Wang, *Joule*, 2021, **5**, 228-248.
- S8. G. Liang, F. Mo, D. Wang, X. Li, Z. Huang, H. Li and C. Zhi, *Energy Storage Mater.*, 2020, **25**, 86-92.
- S9. Y. Zhang, S. Deng, Y. Li, B. Liu, G. Pan, Q. Liu, X. Wang, X. Xia and J. Tu, *Energy Storage Mater.*, 2020, **29**, 52-59.
- S10. H. Jia, M. Qiu, C. Tang, H. Liu, J. Xu, B. Tawiah, S.-x. Jiang and X. Zhang, *Adv. Fiber Mater.*, 2022, 1-11.
